# Supplementary material
Source: PubMed Central journal article supplement (PMC7597607)

Suppl Figure 1

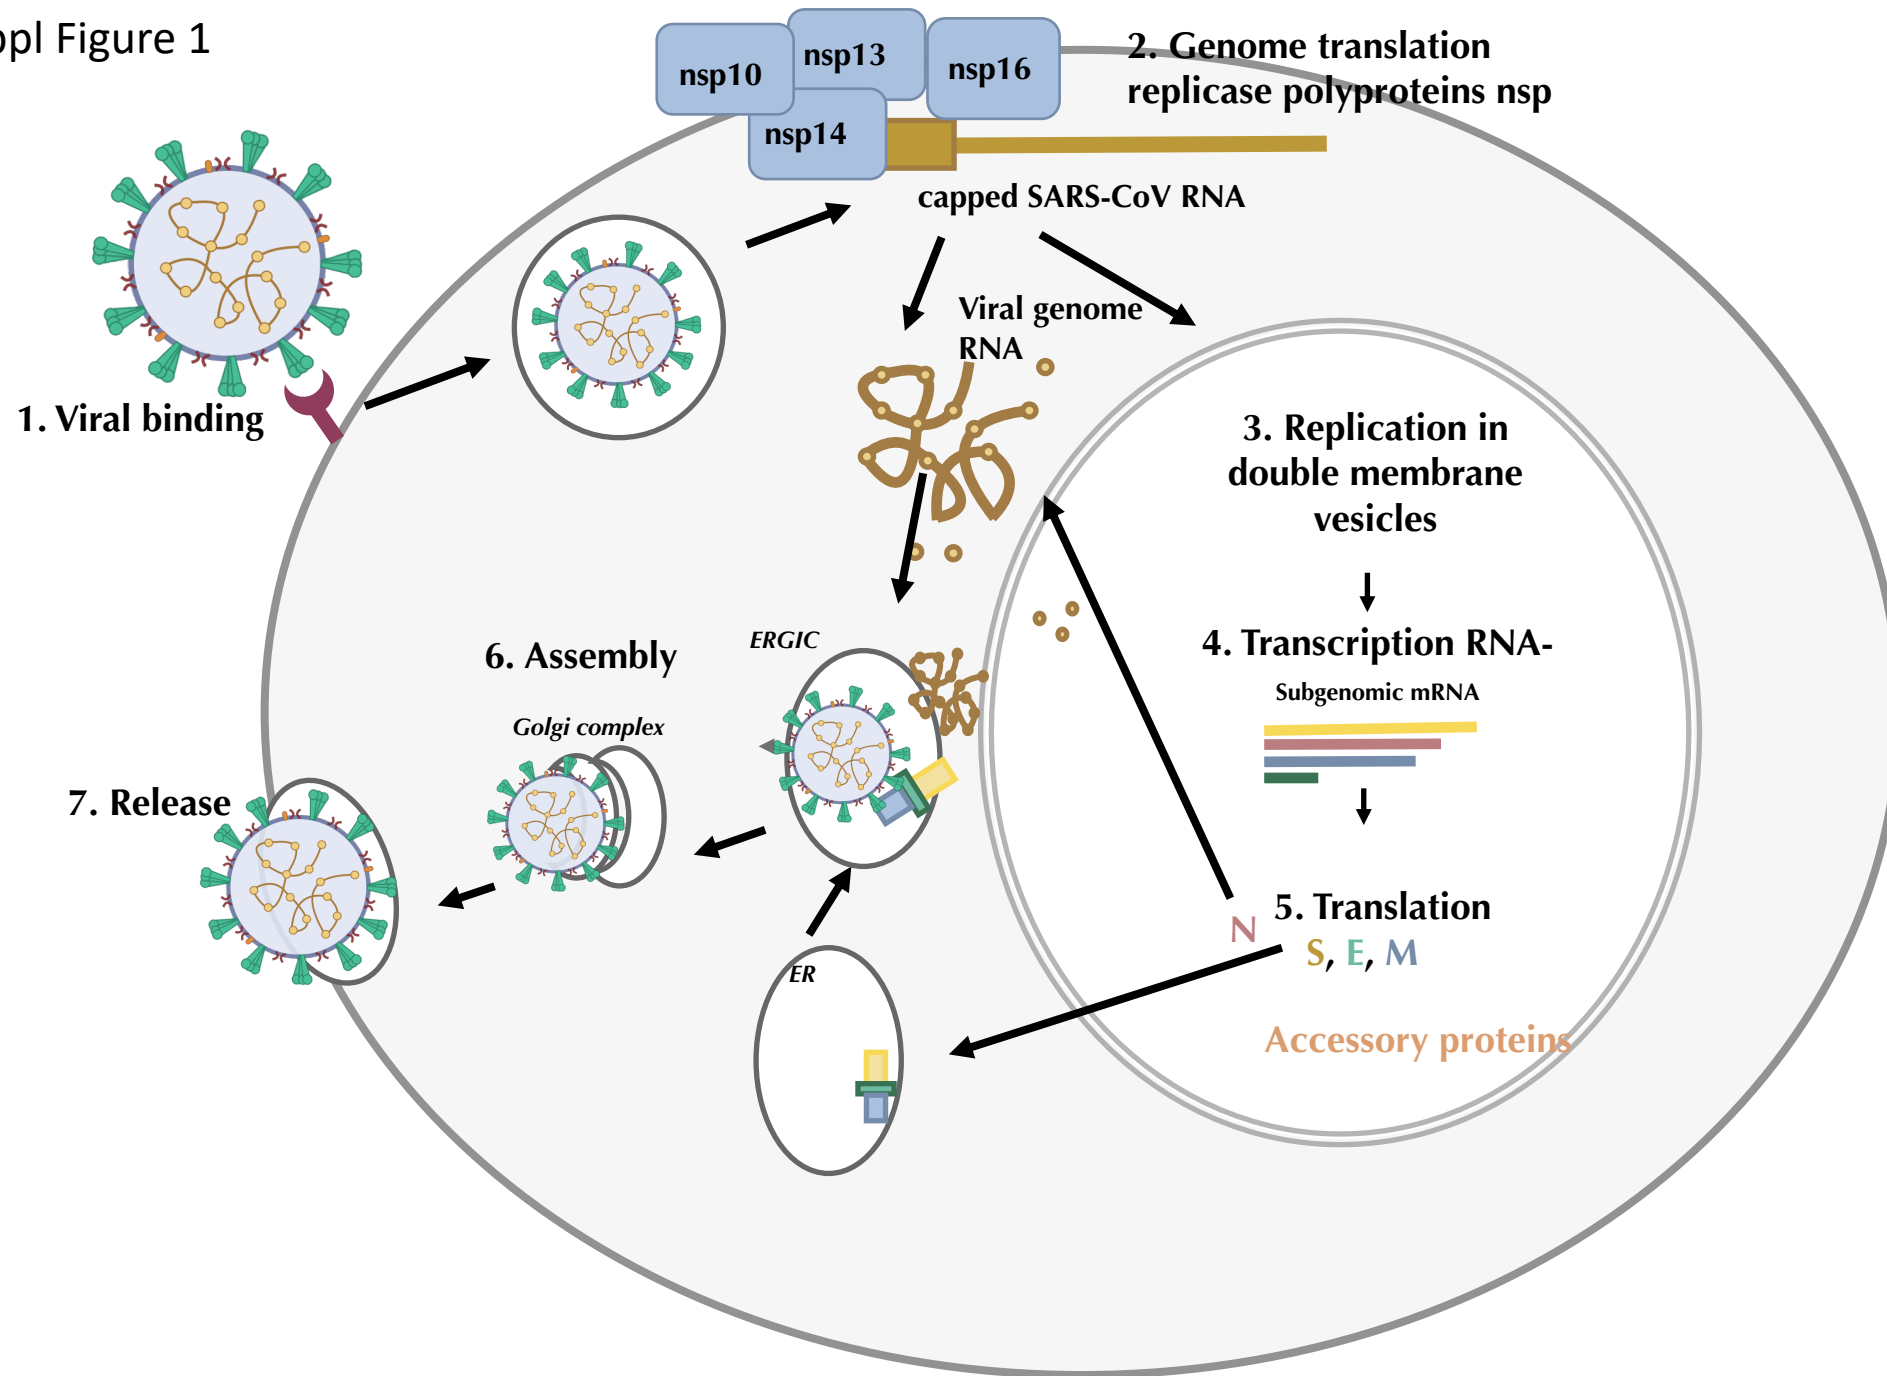

Supplement: CEI-202-193-s001.pdf [file CEI-202-193-s001.pdf]
